## CORRECTION

There is an error in the print version of *Development* **141**, 1421.

In the piece 'Measuring signal RAtio for limb patterning', it should read: Miguel Torres and co-workers (p. 1534) now show that RA can inhibit distal identity in both chick and mouse. Distal inactivation of *Meis1/2* is required for complete downregulation of RA signalling, hence permitting *Hoxa13* expression to specify the autopod.

The online version has been corrected.

We apologise to the authors and readers for this mistake.
